# Supplementary material for: Trends in Gastric Cancer Mortality in the US: A Population-Based Analysis, 1999-2023
Source: Research Square preprint supplement (doi:10.21203/rs.3.rs-6327806/v1), 2025-05-13
Supplement: Supplementary file 1 [file 450252ac74b9af00c2aa9e0b.docx]

**Gastric cancer Supplementary Tables**

**Supplemental Table 1**: Overall and sex stratified Gastric cancer–related mortality, among Adults in the United States from 1999 to 2023

| Deaths | | | |
| --- | --- | --- | --- |
| Year | **Men** | **Women** | **Overall** |
| 1999 | 8284 | 5783 | 14067 |
| 2000 | 8058 | 5871 | 13929 |
| 2001 | 7883 | 5618 | 13501 |
| 2002 | 7789 | 5495 | 13284 |
| 2003 | 7699 | 5506 | 13205 |
| 2004 | 7583 | 5302 | 12885 |
| 2005 | 7353 | 5170 | 12523 |
| 2006 | 7212 | 5118 | 12330 |
| 2007 | 7354 | 5025 | 12379 |
| 2008 | 7310 | 4982 | 12292 |
| 2009 | 7184 | 4847 | 12031 |
| 2010 | 7287 | 5030 | 12317 |
| 2011 | 7099 | 4856 | 11955 |
| 2012 | 7163 | 4924 | 12087 |
| 2013 | 7306 | 4804 | 12110 |
| 2014 | 7370 | 4861 | 12231 |
| 2015 | 7279 | 4881 | 12160 |
| 2016 | 7409 | 4943 | 12352 |
| 2017 | 7215 | 4811 | 12026 |
| 2018 | 7215 | 4787 | 12002 |
| 2019 | 7201 | 4806 | 12007 |
| 2020 | 7391 | 4959 | 12350 |
| 2021 | 7339 | 4774 | 12113 |
| 2022 | 7166 | 4874 | 12040 |
| 2023 | 7242 | 4882 | 12124 |
| Total | **185391** | **126909** | **312300** |

**Supplemental Table 2:** Gastric cancer –related deaths, stratified by Race among Adults in United States, 1999 to 2020

| Deaths | | | | | | |
| --- | --- | --- | --- | --- | --- | --- |
| Year | **NH White** | **NH Black**  **or**  **African**  **American** | **NH**  **American**  **Indian**  **or**  **Alaska Native** | **NH Asian**  **or**  **Pacific**  **Islander** | **Hispanic**  **Or**  **Latino** | **Overall Population** |
| 1999 | 9663 | 2407 | 69 | 723 | 1160 | 180408769 |
| 2000 | 9502 | 2364 | 79 | 745 | 1193 | 181984640 |
| 2001 | 9142 | 2248 | 80 | 724 | 1270 | 184305128 |
| 2002 | 8889 | 2283 | 96 | 704 | 1271 | 186208028 |
| 2003 | 8811 | 2186 | 91 | 745 | 1339 | 188090429 |
| 2004 | 8447 | 2170 | 78 | 729 | 1437 | 190205384 |
| 2005 | 8153 | 2109 | 92 | 795 | 1352 | 192551384 |
| 2006 | 7970 | 2075 | 85 | 812 | 1377 | 195019359 |
| 2007 | 7915 | 2154 | 92 | 805 | 1405 | 197403777 |
| 2008 | 7713 | 2204 | 71 | 800 | 1481 | 199795090 |
| 2009 | 7510 | 2101 | 90 | 818 | 1496 | 202107016 |
| 2010 | 7597 | 2139 | 90 | 820 | 1647 | 203891983 |
| 2011 | 7328 | 2110 | 82 | 825 | 1582 | 206592936 |
| 2012 | 7275 | 2108 | 103 | 892 | 1677 | 208826037 |
| 2013 | 7321 | 2069 | 105 | 854 | 1738 | 211085314 |
| 2014 | 7220 | 2117 | 113 | 915 | 1830 | 213809280 |
| 2015 | 7124 | 2134 | 89 | 932 | 1841 | 216553817 |
| 2016 | 7057 | 2184 | 105 | 1041 | 1931 | 218641417 |
| 2017 | 6846 | 2011 | 103 | 1022 | 2021 | 221447331 |
| 2018 | 6759 | 2152 | 100 | 915 | 2050 | 223311190 |
| 2019 | 6764 | 2070 | 109 | 976 | 2070 | 224981167 |
| 2020 | 6908 | 2175 | 114 | 974 | 2163 | 226635013 |
| Total | 171914 | 47570 | 2036 | 18566 | 35331 | 4473854489 |

NH=Non Hispanic

**Supplemental Table 3:** Overall and Sex‐Stratified of Gastric cancer –related Age-Adjusted Mortality Rates per 1000,000 among Adults in the United States from 1999 to 2022

| Age-Adjusted Mortality Rate (95% CI) | | | |
| --- | --- | --- | --- |
| Year | **Men** | **Women** | **Overall** |
| 1999 | 113.8  (111.3 - 116.3) | 55.4  (54.0 - 56.8) | 79.5  (78.2 - 80.8) |
| 2000 | 109.5  (107.1 - 111.9) | 55.4  (54.0 - 56.9) | 77.8  (76.5 - 79.1) |
| 2001 | 104.1  (101.8 - 106.4) | 52.5  (51.1 - 53.9) | 74.2  (72.9 - 75.4) |
| 2002 | 101.5  (99.2 - 103.8) | 50.6  (49.3 - 52.0) | 71.8  (70.6 - 73.0) |
| 2003 | 97.5  (95.3 - 99.7) | 50.2  (48.9 - 51.6) | 70.1  (68.9 - 71.3) |
| 2004 | 94.6  (92.4 - 96.8) | 48.0  (46.7 - 49.3) | 67.4  (66.2 - 68.6) |
| 2005 | 89.4  (87.4 - 91.5) | 46.0  (44.7 - 47.2) | 64.4  (63.2 - 65.5) |
| 2006 | 85.4  (83.4 - 87.4) | 45.0  (43.8 - 46.3) | 62.1  (61.0 - 63.2) |
| 2007 | 85.3  (83.3 - 87.3) | 43.5  (42.3 - 44.7) | 61.3  (60.2 - 62.3) |
| 2008 | 82.0  (80.1 - 84.0) | 42.2  (41.0 - 43.4) | 59.4  (58.4 - 60.5) |
| 2009 | 78.8  (76.9 - 80.6) | 40.6  (39.5 - 41.8) | 57.2  (56.2 - 58.2) |
| 2010 | 78.7  (76.9 - 80.6) | 41.5  (40.4 - 42.7) | 57.5  (56.5 - 58.5) |
| 2011 | 74.4  (72.6 - 76.1) | 39.3  (38.2 - 40.5) | 54.6  (53.6 - 55.6) |
| 2012 | 72.3  (70.6 - 74.1) | 39.3  (38.2 - 40.4) | 53.8  (52.9 - 54.8) |
| 2013 | 72.3  (70.7 - 74.0) | 37.5  (36.5 - 38.6) | 52.8  (51.9 - 53.8) |
| 2014 | 71.0  (69.4 - 72.7) | 37.3  (36.3 - 38.4) | 52.2  (51.3 - 53.2) |
| 2015 | 68.3  (66.7 - 69.9) | 37.0  (35.9 - 38.0) | 50.9  (50.0 - 51.8) |
| 2016 | 67.7  (66.1 - 69.2) | 36.7  (35.7 - 37.8) | 50.4  (49.5 - 51.3) |
| 2017 | 64.4  (62.9 - 66.0) | 35.1  (34.1 - 36.2) | 48.1  (47.3 - 49.0) |
| 2018 | 62.9  (61.4 - 64.4) | 34.4  (33.4 - 35.4) | 47.1  (46.2 - 47.9) |
| 2019 | 61.5  (60.0 - 62.9) | 34.0  (33.0 - 35.0) | 46.3  (45.4 - 47.1) |
| 2020 | 61.8  (60.4 - 63.3) | 34.6  (33.6 - 35.6) | 46.8  (45.9 - 47.6) |
| 2021 | 61.2 (59.8 - 62.7) | 33.8 (32.8 - 34.8) | 46.1 (45.3 - 47.0) |
| 2022 | 58.3 (57.0 - 59.7) | 33.5 (32.5 - 34.5) | 44.6 (43.8 - 45.4) |
| 2023 | 58.0 (56.6 - 59.3) | 33.2 (32.3 - 34.2) | 44.4 (43.5 - 45.2) |

**Supplemental Table 4:** Gastric cancer –relatedAge-Adjusted Mortality Rates per 1000,000, Stratified by Race among Adults in the United States from 1999 to 2020

| Age-Adjusted Mortality Rate (95% CI) | | | | | |
| --- | --- | --- | --- | --- | --- |
| Year | **NH American**  **Indian or Alaska Native** | **NH Asian or Pacific Islander** | **NH White** | **NH Black or African American** | **Hispanic or Latino** |
| 1999 | 89.5  (68.6 - 114.7) | 164.7  (151.9 - 177.4) | 65.6  (64.2 - 66.9) | 159.5  (153.0 - 165.9) | 122.0  (114.5 - 129.4) |
| 2000 | 98.3  (76.9 - 123.7) | 166.6  (154.0 - 179.2) | 63.9  (62.6 - 65.2) | 154.8  (148.4 - 161.1) | 119.6  (112.4 - 126.8) |
| 2001 | 101.1  (79.1 - 127.3) | 145.1  (134.0 - 156.2) | 60.8  (59.6 - 62.1) | 143.6  (137.5 - 149.6) | 116.3  (109.5 - 123.0) |
| 2002 | 111.6  (89.1 - 138.0) | 135.2  (124.7 - 145.6) | 58.4  (57.2 - 59.6) | 144.2  (138.2 - 150.2) | 114.1  (107.5 - 120.8) |
| 2003 | 100.4  (79.5 - 125.2) | 136.5  (126.2 - 146.8) | 57.3  (56.1 - 58.5) | 134.4  (128.6 - 140.1) | 111.9  (105.6 - 118.3) |
| 2004 | 83.4  (64.6 - 105.9) | 122.4  (113.1 - 131.7) | 54.3  (53.1 - 55.5) | 129.7  (124.2 - 135.3) | 113.8  (107.5 - 120.1) |
| 2005 | 89.9  (71.3 - 111.9) | 126.7  (117.6 - 135.9) | 51.8  (50.6 - 52.9) | 124.2  (118.8 - 129.6) | 102.6  (96.8 - 108.4) |
| 2006 | 84.9  (66.7 - 106.6) | 121.8  (113.1 - 130.5) | 49.9  (48.8 - 51.0) | 119.2  (114.0 - 124.5) | 97.0  (91.5 - 102.4) |
| 2007 | 84.4  (66.9 - 105.0) | 116.2  (107.9 - 124.5) | 49.1  (48.0 - 50.1) | 119.1  (114.0 - 124.3) | 97.8  (92.4 - 103.2) |
| 2008 | 63.6  (48.7 - 81.5) | 111.0  (103.0 - 118.9) | 46.8  (45.7 - 47.8) | 118.5  (113.4 - 123.5) | 94.3  (89.2 - 99.4) |
| 2009 | 77.5  (61.3 - 96.8) | 107.9  (100.3 - 115.6) | 45.2  (44.1 - 46.2) | 110.0  (105.2 - 114.9) | 91.8  (86.8 - 96.7) |
| 2010 | 76.0  (60.2 - 94.7) | 102.9  (95.6 - 110.1) | 45.0  (44.0 - 46.1) | 109.5  (104.7 - 114.3) | 95.9  (91.0 - 100.8) |
| 2011 | 69.3  (54.3 - 87.1) | 96.0  (89.3 - 102.8) | 42.6  (41.6 - 43.6) | 104.7  (100.1 - 109.3) | 85.9  (81.4 - 90.4) |
| 2012 | 83.8  (66.7 - 101.0) | 97.3  (90.7 - 103.9) | 41.7  (40.7 - 42.7) | 100.3  (95.8 - 104.7) | 86.0  (81.6 - 90.3) |
| 2013 | 81.1  (64.7 - 97.4) | 87.3  (81.3 - 93.3) | 41.3  (40.3 - 42.3) | 95.4  (91.2 - 99.7) | 85.3  (81.0 - 89.5) |
| 2014 | 82.7  (66.7 - 98.8) | 88.0  (82.2 - 93.8) | 40.1  (39.1 - 41.0) | 93.7  (89.6 - 97.8) | 85.5  (81.4 - 89.6) |
| 2015 | 58.8  (46.7 - 73.1) | 84.9  (79.4 - 90.5) | 39.0  (38.1 - 40.0) | 92.1  (88.1 - 96.1) | 79.5  (75.7 - 83.3) |
| 2016 | 69.8  (55.9 - 83.6) | 89.9  (84.3 - 95.4) | 37.9  (37.0 - 38.8) | 90.5  (86.6 - 94.4) | 81.4  (77.6 - 85.2) |
| 2017 | 68.2  (54.5 - 81.9) | 83.1  (78.0 - 88.3) | 36.4  (35.5 - 37.3) | 81.6  (77.9 - 85.3) | 81.0  (77.3 - 84.7) |
| 2018 | 60.7  (48.4 - 73.0) | 72.2  (67.5 - 76.9) | 35.3  (34.4 - 36.1) | 85.1  (81.4 - 88.8) | 77.6  (74.1 - 81.1) |
| 2019 | 63.7  (51.4 - 76.1) | 72.7  (68.1 - 77.3) | 35.0  (34.1 - 35.8) | 79.4  (75.9 - 82.9) | 76.4  (73.0 - 79.8) |
| 2020 | 67.1  (54.5 - 79.8) | 69.3  (64.9 - 73.7) | 35.3  (34.5 - 36.2) | 81.3  (77.8 - 84.8) | 76.2  (72.9 - 79.5) |

AAMR=Age Adjusted Mortality rate, NH=Non Hispanic

**Supplemental Table 5:**  Gastric cancer–relatedAge-Adjusted Mortality Rates per 1000,000 Stratified by Urban-Rural Classification among Adults in the United States from 1999 to 2020

| **Age-Adjusted Mortality Rate (95% CI)** | | |
| --- | --- | --- |
|
| **Year** | **Metropolitan** | **Nonmetropolitan** |
| 1999 | 84.4 (82.8 - 86.0) | 67.4 (65.1 - 69.7) |
|  |  |
| 2000 | 81.7 (80.2 - 83.3) | 67.9 (65.6 - 70.2) |
|  |  |
| 2001 | 78.8 (77.3 - 80.3) | 62.2 (60.0 - 64.4) |
|  |  |
| 2002 | 76.0 (74.5 - 77.5) | 61.0 (58.9 - 63.1) |
|  |  |
| 2003 | 73.1 (71.7 - 74.6) | 62.6 (60.4 - 64.7) |
|  |  |
| 2004 | 71.7 (70.3 - 73.1 | 56.4 (54.3 - 58.4) |
|  |  |
| 2005 | 68.6 (67.2 - 69.9 | 53.6 (51.6 - 55.6) |
|  |  |
| 2006 | 65.3 (64.0 - 66.6) | 53.7 (51.8 - 55.6) |
|  |  |
| 2007 | 64.8 (63.5 - 66.1) | 52.2 (50.2 - 54.1) |
|  |  |
| 2008 | 62.7 (61.4 - 64.0) | 51.0 (49.1 - 52.8) |
|  |  |
| 2009 | 60.1 (58.9 - 61.3) | 49.7 (47.8 - 51.5) |
|  |  |
| 2010 | 60.2 (59.0 - 61.4) | 50.4 (48.5 - 52.2) |
|  |  |
| 2011 | 57.4 (56.2 - 58.6) | 47.0 (45.3 - 48.8) |
|  |  |
| 2012 | 56.8 (55.7 - 58.0) | 45.8 (44.0 - 47.5) |
|  |  |
| 2013 | 55.5 (54.4 - 56.7) | 45.3 (43.6 - 47.0) |
|  |  |
| 2014 | 54.9 (53.8 - 56.0) | 44.8 (43.1 - 46.5) |
|  |  |
| 2015 | 53.1 (52.0 - 54.2) | 44.6 (43.0 - 46.3) |
|  |  |
| 2016 | 53.0 (51.9 - 54.1) | 43.0 (41.3 - 44.6) |
|  |  |
| 2017 | 50.1 (49.1 - 51.2) | 42.6 (40.9 - 44.2) |
|  |  |
| 2018 | 49.1 (48.1 - 50.1) | 41.3 (39.7 - 42.9) |
|  |  |
| 2019 | 47.9 (47.0 - 48.9) | 41.4 (39.9 - 43.0) |
|  |  |
| 2020 | 48.8 (47.8 - 49.8) | 40.7 (39.1 - 42.2) |
|  |  |

95% CI= 95% Confidence Interval

**Supplemental Table 6**: Gastric cancer–related Age-Adjusted Mortality Rates per 1000,000 Stratified by census region among Adults in the United States from 1999 to 2020

| **Age-Adjusted Mortality Rate (95% CI)** | | | | |
| --- | --- | --- | --- | --- |
| **Year** | **Northeast** | **Midwest** | **South** | **West** |
| **1999** | 91.9 (88.9 - 95.0) | 70.7 (68.2 - 73.3) | 75.9 (73.7 - 78.0) | 83.3 (80.3 - 86.3) |
| **2000** | 88.6 (85.6 - 91.7) | 67.3 (64.8 - 69.8) | 75.9 (73.8 - 78.1) | 81.9 (79.0 - 84.9) |
| **2001** | 83.8 (80.9 - 86.7) | 65.2 (62.7 - 67.6) | 72.6 (70.5 - 74.7) | 77.0 (74.2 - 79.8) |
| **2002** | 80.9 (78.0 - 83.7) | 62.9 (60.5 - 65.3) | 69.7 (67.7 - 71.7) | 75.9 (73.2 - 78.7) |
| **2003** | 78.1 (75.3 - 80.9) | 62.4 (60.1 - 64.8) | 68.6 (66.6 - 70.6) | 73.3 (70.6 - 76.0) |
| **2004** | 76.3 (73.6 - 79.1) | 60.0 (57.7 - 62.3) | 65.5 (63.6 - 67.5) | 69.6 (67.0 - 72.2) |
| **2005** | 71.7 (69.1 - 74.4) | 56.2 (54.0 - 58.4) | 62.3 (60.4 - 64.1) | 69.5 (67.0 - 72.1) |
| **2006** | 67.1 (64.6 - 69.7) | 54.7 (52.6 - 56.9) | 60.3 (58.5 - 62.1) | 68.1 (65.6 - 70.6) |
| **2007** | 65.9 (63.4 - 68.4) | 54.2 (52.0 - 56.3) | 60.5 (58.7 - 62.3) | 65.5 (63.0 - 67.9) |
| **2008** | 65.4 (62.9 - 67.9) | 52.4 (50.3 - 54.5) | 59.3 (57.6 - 61.1) | 61.3 (59.0 - 63.6) |
| **2009** | 61.7 (59.3 - 64.1) | 50.9 (48.8 - 52.9) | 56.2 (54.5 - 57.9) | 61.2 (58.9 - 63.5) |
| **2010** | 59.7 (57.3 - 62.1) | 49.4 (47.4 - 51.4) | 58.1 (56.4 - 59.8) | 62.5 (60.2 - 64.9) |
| **2011** | 55.2 (53.0 - 57.5) | 48.9 (46.9 - 50.9) | 55.2 (53.6 - 56.9) | 58.4 (56.2 - 60.6) |
| **2012** | 57.6 (55.3 - 59.9) | 46.6 (44.7 - 48.5) | 53.5 (51.9 - 55.1) | 58.0 (55.8 - 60.2) |
| **2013** | 54.6 (52.4 - 56.9) | 45.0 (43.1 - 46.9) | 54.4 (52.8 - 55.9) | 56.0 (53.9 - 58.1) |
| **2014** | 55.0 (52.7 - 57.2) | 44.5 (42.6 - 46.3) | 52.2 (50.7 - 53.7) | 57.3 (55.2 - 59.4) |
| **2015** | 51.8 (49.6 - 53.9) | 45.8 (44.0 - 47.7) | 51.7 (50.2 - 53.2) | 53.4 (51.5 - 55.4) |
| **2016** | 52.3 (50.1 - 54.4) | 43.0 (41.2 - 44.8) | 50.5 (49.0 - 51.9) | 55.8 (53.8 - 57.9) |
| **2017** | 50.5 (48.4 - 52.6) | 40.4 (38.7 - 42.2) | 48.8 (47.3 - 50.2) | 52.4 (50.5 - 54.3) |
| **2018** | 47.4 (45.4 - 49.4) | 40.5 (38.7 - 42.2) | 47.5 (46.1 - 48.9) | 52.1 (50.2 - 54.0) |
| **2019** | 47.6 (45.6 - 49.6) | 40.1 (38.4 - 41.8) | 46.6 (45.2 - 48.0) | 50.3 (48.4 - 52.1) |
| **2020** | 46.8 (44.8 - 48.8) | 39.2 (37.5 - 40.9) | 47.7 (46.4 - 49.1) | 52.0 (50.1 - 53.9) |
| **Total** | **62.9 (62.4 - 63.4)** | **50.9 (50.5 - 51.3)** | **57.4 (57.1 - 57.8)** | **61.7 (61.2 - 62.2)** |

**Supplemental Table 7:** Gastric cancer –relatedAge Adjusted Mortality Rates per 1000,000, Stratified by States among Adults in the United States from 1999 to 2020

| **Deaths** | |
| --- | --- |
| **State** | **Age-Adjusted Mortality Rate (95% CI)** |
| **Alabama** | 58.7 (56.9 - 60.4) |
| **Alaska** | 71.3 (64.8 - 77.8) |
| **Arizona** | 48.0 (46.6 - 49.3) |
| **Arkansas** | 54.9 (52.8 - 57.1) |
| **California** | 72.8 (72.0 - 73.5) |
| **Colorado** | 46.1 (44.5 - 47.7) |
| **Connecticut** | 64.3 (62.3 - 66.3) |
| **Delaware** | 60.0 (56.0 - 64.0) |
| **District of Columbia** | 87.2 (80.9 - 93.6) |
| **Florida** | 51.4 (50.6 - 52.1) |
| **Georgia** | 57.4 (56.0 - 58.7) |
| **Hawaii** | 96.5 (92.4 - 100.5) |
| **Idaho** | 40.0 (37.3 - 42.6) |
| **Illinois** | 62.5 (61.4 - 63.6) |
| **Indiana** | 46.3 (44.9 - 47.6) |
| **Iowa** | 40.8 (39.1 - 42.6) |
| **Kansas** | 43.2 (41.3 - 45.2) |
| **Kentucky** | 52.1 (50.4 - 53.9) |
| **Louisiana** | 69.9 (67.8 - 71.9) |
| **Maine** | 45.6 (42.9 - 48.3) |
| **Maryland** | 59.1 (57.5 - 60.8) |
| **Massachusetts** | 59.8 (58.3 - 61.2) |
| **Michigan** | 53.7 (52.6 - 54.8) |
| **Minnesota** | 46.3 (44.8 - 47.7) |
| **Mississippi** | 69.9 (67.4 - 72.3) |
| **Missouri** | 46.0 (44.6 - 47.3) |
| **Montana** | 41.0 (37.9 - 44.1) |
|
| **Nebraska** | 41.3 (38.9 - 43.6) |
| **Nevada** | 49.0 (46.7 - 51.3) |
| **New Hampshire** | 43.3 (40.5 - 46.1) |
| **New Jersey** | 67.6 (66.2 - 68.9) |
| **New Mexico** | 67.0 (64.1 - 69.9) |
| **New York** | 70.6 (69.7 - 71.5) |
| **North Carolina** | 54.0 (52.8 - 55.2) |
| **North Dakota** | 51.4 (47.2 - 55.6) |
| **Ohio** | 51.4 (50.3 - 52.4) |
| **Oklahoma** | 49.4 (47.5 - 51.2) |
| **Oregon** | 44.4 (42.7 - 46.1) |
| **Pennsylvania** | 54.6 (53.6 - 55.5) |
| **Rhode Island** | 68.3 (64.5 - 72.1) |
| **South Carolina** | 64.7 (62.8 - 66.6) |
| **South Dakota** | 45.7 (42.1 - 49.3) |
| **Tennessee** | 53.0 (51.5 - 54.5) |
| **Texas** | 64.5 (63.6 - 65.4) |
| **Utah** | 39.1 (36.8 - 41.4) |
| **Vermont** | 43.2 (39.2 - 47.2) |
| **Virginia** | 54.1 (52.8 - 55.5) |
| **Washington** | 51.0 (49.6 - 52.4) |
| **West Virginia** | 50.1 (47.7 - 52.5) |
| **Wisconsin** | 48.7 (47.3 - 50.1) |
| **Wyoming** | 36.6 (32.4 - 40.8) |
